# Supplementary material for: Direct spinning of fiber supercapacitor
Source: Royal Society of Chemistry journal article supplement (doi:10.1039/c6nr03116a), 2016-01-01
Supplement: c6nr03116a2.pdf [file c6nr03116a2.pdf]

Supplementary information for  
**Direct spinning of fiber supercapacitor**

Tong Xu, Xiaoteng Ding, Yuan Liang, Yang Zhao, Nan Chen and Liangti Qu\*

Key Laboratory of Photoelectronic/Electrophotonic Conversion Materials, Key  
Laboratory of Cluster Science, Ministry of Education of China, School of Chemistry,  
Beijing Institute of Technology, Beijing 100081, P. R. China.

E-mail: lqu@bit.edu.cn; Fax: +86 10 68918608; Tel: +86 10 68918608

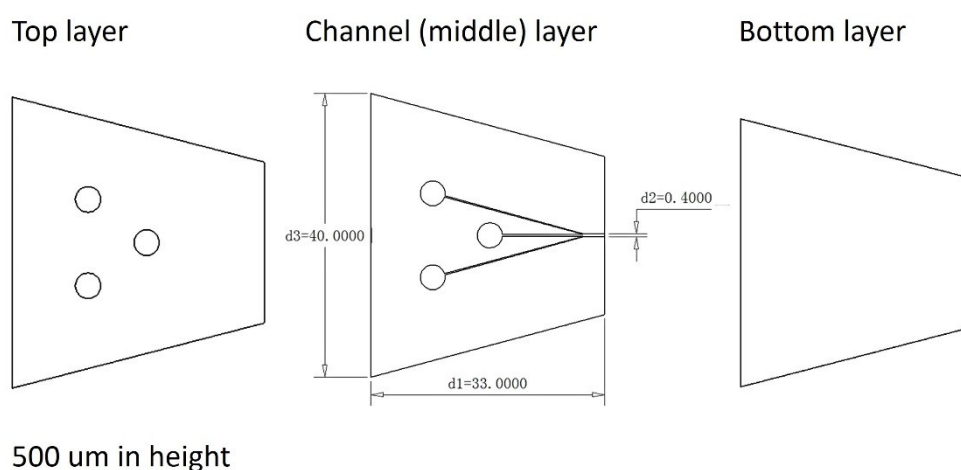

**Fig. S1** (a) Design of costumed PMMA spinneret, the height of the PMMA layer is set to be 500 μm, the unit in the drawing is millimeter.

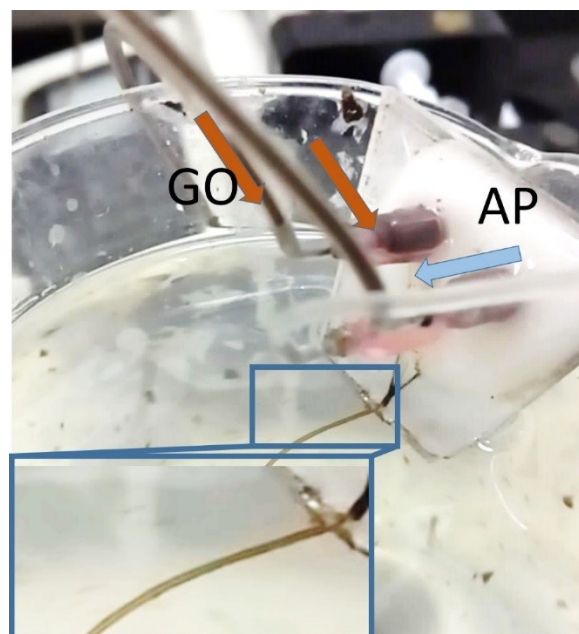

**Fig. S2** Optical photo of the operation process, the inset is magnified photo of the outlet, which indicates the clear boundary between each phases.

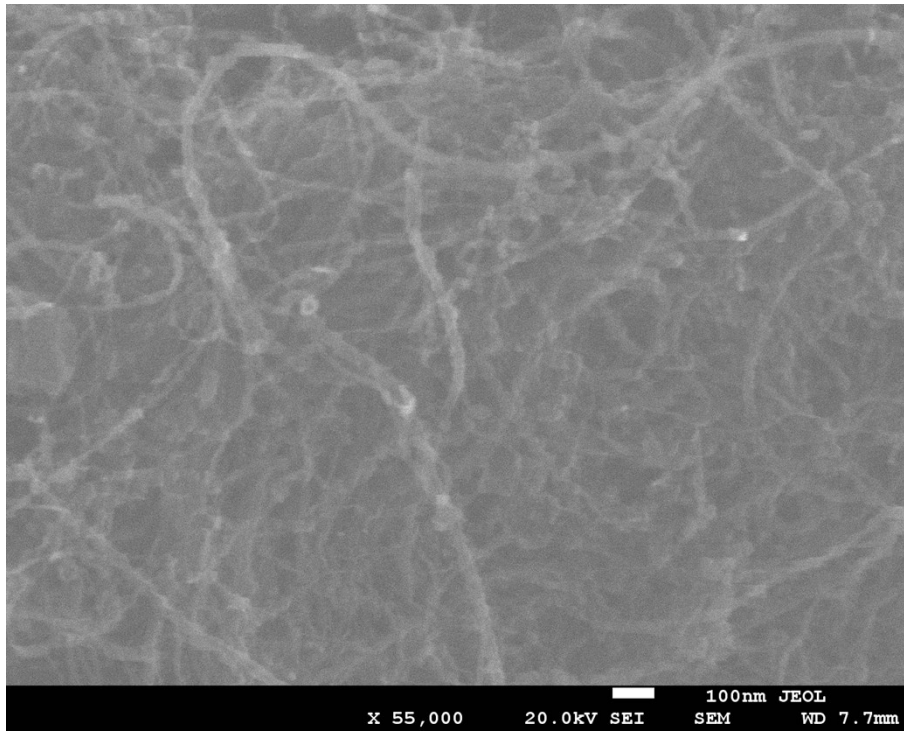

Fig. S3 SEM image presents the morphology of the raw CNTs.

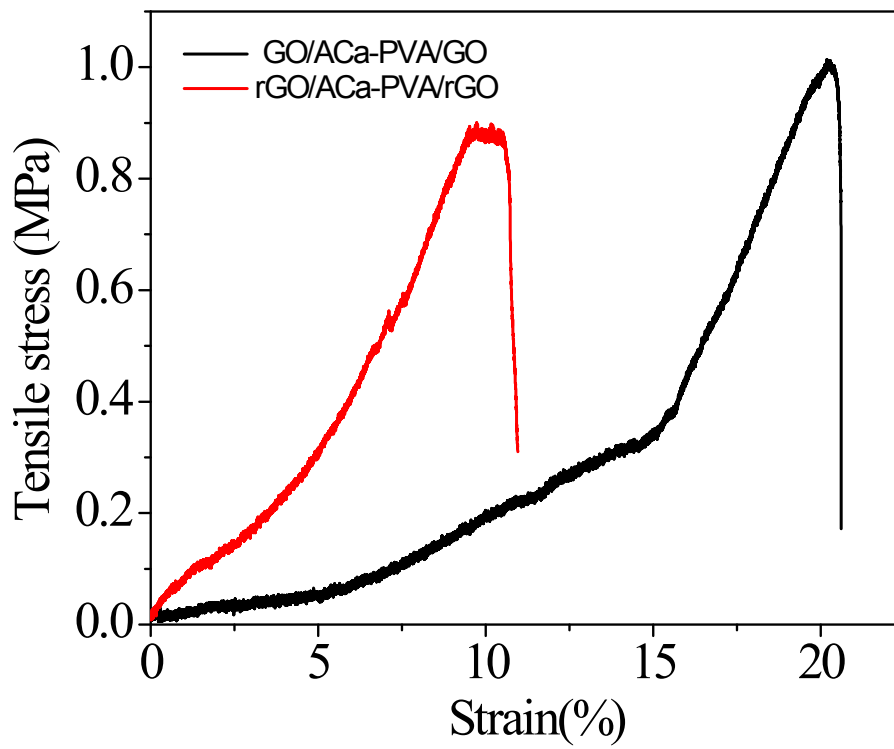

Fig. S4 Strain-stress curve of rGO/ACa-PVA/rGO structure.

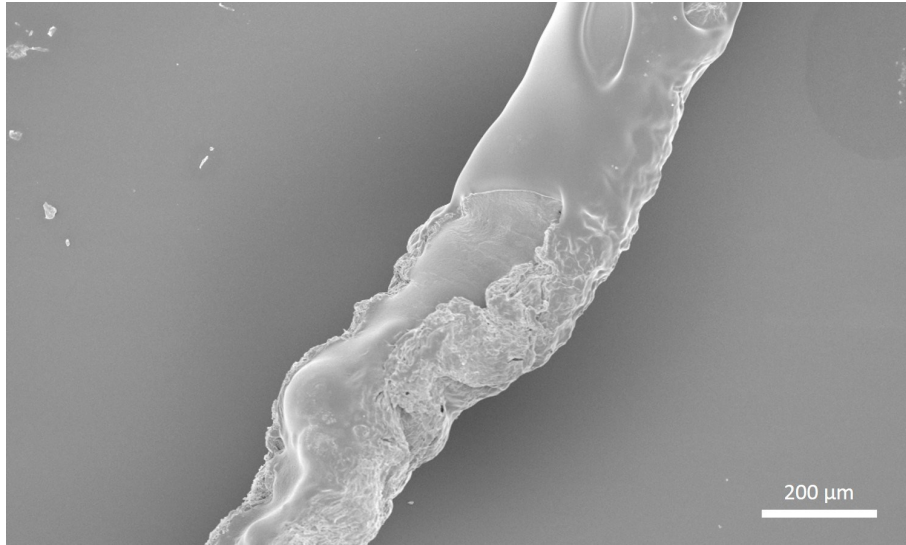

**Fig. S5** SEM image of rGO/ACa-PVA/rGO partially covered with PDMS.
